# Supplementary material for: Glutathione Is Required for the Early Alert Response and Subsequent Acclimation in Cadmium-Exposed Arabidopsis thaliana Plants
Source: MDPI journal article supplement (doi:10.3390/antiox11010006), 2021-12-21
Supplement: s1 [file s1]

**Supplemental Table S1** Forward and reverse primer sequences used for gene expression analyses (RT-qPCR) of genes of interest. Ex jn: exon junction x2: primer concentration of 600 nM instead of 300 nM

| Genes of interest |           |                           |                           |                 |               |
|-------------------|-----------|---------------------------|---------------------------|-----------------|---------------|
| Gene              | Locus     | Forward Primer (5'-3')    | Reverse Primer (5'-3')    | Primer Location | Amplicon Size |
| <i>GSH1</i>       | AT4G23100 | CCCTGGTGAAGTGCCTTCA       | CATCAGCACCTCTCATCTCCA     | Exon 10 and 11  | 101 bp        |
| <i>GSH2</i>       | AT5G27380 | GGACTCGTCGTTGGTGACAA      | TCTGGGAATGCAGTTGGTAGC     | Exon 1 and 2    | 101 bp        |
| <i>GR1</i>        | AT3G24170 | CTCAAGTGTGGAGCAACCAAAG    | ATGCGTCTGGTCACACTGC       | Exon 15 and 16  | 101 bp        |
| <i>GGT1</i>       | AT4G39640 | TAGATGTTCCACCACCAGCA      | GGCAATAATGTTGGCTCCTC      | Exon 4 and 5    | 140 bp        |
| <i>ZAT6</i>       | AT5G04340 | TGACCTGCCTTCTTCTTCGT      | GTCCACCAAGAGCCTGGTAA      | No introns      | 113 bp        |
| <i>RBOHC</i>      | AT5G51060 | TCACCAGAGACTGGCACAATAAA   | GATGCTCGACCTGAATGCTC      | Exon 6 and 7    | 101 bp        |
| <i>RBOHD</i>      | AT5G47910 | AACTCTCCGCTGATTCCAACG     | TGGTCAGCGAAGTCTTTAGATTCTT | Exon 1 and 2    | 91 bp         |
| <i>RBOHF</i>      | AT1G64060 | GGTGTCATGAACGAAGTTGCA     | AATGAGAGCAGAACGAGCATCA    | Exon 11 and 12  | 105 bp        |
| <i>AT1G05340</i>  | AT1G05340 | TCGGTAGCTCAGGGTAAAGTGG    | CCAGGGCACAACAGCAACA       | Exon 2 and 3    | 91 bp         |
| <i>AT1G19020</i>  | AT1G19020 | GAAAATGGGACAAGGGTTAGACAAA | CCCAACGAAAACCAATAGCAGA    | No introns      | 92 bp         |
| <i>AT1G57630</i>  | AT1G57630 | ACTCAAACAGGCGATCAAAGGA    | CACCAATTCGTCAAGACAACACC   | No introns      | 91 bp         |
| <i>AT2G21640</i>  | AT2G21640 | GACTTGTTTCAAAAACACCATGGAC | CACTTCCTTAGCCTCAATTTGCTTC | Exon 1 and 2    | 91 bp         |
| <i>AT2G43510</i>  | AT2G43510 | ATGGCAAAGGCTATCGTTTCC     | CGTTACCTTGCCTTCTATCTCC    | Exon 1 and 2    | 91 bp         |
| <i>ZAT12</i>      | AT5G59820 | GTGCGAGTCACAAGAAGCCTAACA  | GCGACGACGTTTTACCTTCTTCA   | No introns      | 72 bp         |
| <i>RRTF1</i>      | AT4G34410 | CGGAGCAAGAGCTTTCAGTT      | GCGCTTATCACTGTGCTGTC      | No introns      | 109 bp        |
| <i>ACS2</i>       | AT1G01480 | CATGTTCTGCCTTGCGGATC      | ACCTGTCCGCCACCTCAAGT      | Exon 3 and 4    | 91 bp         |

|                           |           |                         |                          |                          |        |
|---------------------------|-----------|-------------------------|--------------------------|--------------------------|--------|
| <i>ACS6</i> <sup>x2</sup> | AT4G11280 | TTAGCTAATCCCGGCGATGG    | ACAAGATTCACTCCGGTTCTCCA  | Exon 3 and 4             | 92 bp  |
| <i>ACO2</i>               | AT1G62380 | TCTACGTTTCGTCACCTCCCTCA | CTCTTACCAAAGTCTTTCATGGCC | Exon 2 and 3             | 91 bp  |
| <i>ACO4</i>               | AT1G05010 | CTCCGATGTCCCTGATCTCG    | ATCCAGTAGCTCCTCCGACAACCT | Exon 2 and 3             | 91 bp  |
| <i>ERF1</i> <sup>x2</sup> | AT3G23240 | TCCTCGGCGATTCTCAATTTT   | CAACCGGAGAACAACCATCCT    | No introns               | 91 bp  |
| <i>OXI1</i>               | AT3G25250 | TAGAGGATCGAACCGGAAAG    | GACCCTTGATTTCCTCAACG     | Exon 2                   | 149 bp |
| <i>MPK3</i>               | AT3G45640 | GACGTTTGACCCCAACAGAA    | TGGCTTTTGACAGATTGGCTC    | Exon 5 and 6             | 103 bp |
| <i>MPK6</i>               | AT2G43790 | TAAGTTCCTGACAGTGCATCC   | GATGGGCCAATGCGTCTAA      | Exon 5 and 6             | 101 bp |
| <i>WRKY33</i>             | AT2G38470 | TCATCGATTGTCAGCAGAGACG  | CCATTCCCACCATTTGTTTCAT   | Exon 3 and 4             | 92 bp  |
| <i>APX1</i>               | AT1G07890 | TGCCACAAGGATAGGTCTGG    | CCTTCCTTCTCTCCGCTCAA     | Exon 5 and 6             | 101 bp |
| <i>APX2</i>               | AT3G09640 | TTGCTGTTGAGATCACTGGAGGA | TGAGGCAGACGACCTTCAGG     | Exon 3 and 4             | 91 bp  |
| <i>CAT1</i>               | AT1G20630 | AAGTGCTTCATCGGGAAGGA    | CTTCAACAAAACGCTTCACGA    | Ex jn 5, 6 and<br>exon 7 | 103 bp |
| <i>CAT2</i>               | AT4G35090 | AACTCCTCCATGACCGTTGGA   | TCCGTTCCCTGTCGAAATTG     | Exon 2 and 3             | 76 bp  |

**Supplemental Table S2** Forward and reverse primer sequences used for gene expression analyses (RT-qPCR) of selected reference genes. Ex jn: exon junction; UTR: untranslated region

| Reference genes           |           |                           |                               |                   |               |
|---------------------------|-----------|---------------------------|-------------------------------|-------------------|---------------|
| Gene                      | Locus     | Forward Primer (5'-3')    | Reverse Primer (5'-3')        | Primer Location   | Amplicon Size |
| <i>Leaf</i><br><b>2 h</b> |           |                           |                               |                   |               |
| <i>PPR</i>                | AT5G55840 | AAGACAGTGAAGGTGCAACCTTACT | AGTTTTTGAGTTGTATTTGTCAGAGAAAG | UTR               | 59 bp         |
| <i>MON1</i>               | AT5G55840 | AACTCTATGCAGCATTTGATCCACT | TGATTGCATATCTTTATCGCCATC      | Exon 13 and<br>14 | 61 bp         |

|                   |           |                             |                               |                          |       |
|-------------------|-----------|-----------------------------|-------------------------------|--------------------------|-------|
| <i>EF1α</i>       | AT5G60390 | TGAGCACGCTCTTCTTGCTTTCA     | GGTGGTGGCATCCATCTTGTTACA      | Exon 1 and<br>ex jn 1,2  | 76 bp |
| <b>24 h</b>       |           |                             |                               |                          |       |
| <i>UBC21</i>      | AT5G25760 | CTGCGACTCAGGGAATCTTCTAA     | TTGTGCCATTGAATTGAACCC         | Ex jn 3,4<br>and exon 4  | 61 bp |
| <i>PPR</i>        | AT5G55840 | AAGACAGTGAAGGTGCAACCTTACT   | AGTTTTTGAGTTGTATTTGTCAGAGAAAG | UTR                      | 59 bp |
| <i>MON1</i>       | AT5G55840 | AACTCTATGCAGCATTTGATCCACT   | TGATTGCATATCTTTATCGCCATC      | Exon 13 and<br>14        | 61 bp |
| <b>72 h</b>       |           |                             |                               |                          |       |
| <i>ACT2</i>       | AT3G18780 | CTTGACCAAGCAGCATGAA         | CCGATCCAGACACTGTACTTCCTT      | Exon 2                   | 68 bp |
| <i>FBOX</i>       | AT5G15710 | TTTCGGCTGAGAGGTCGAGT        | GATTCCAAGACGTAAAGCAGATCAA     | Exon 1                   | 63 bp |
| <i>UBQ10</i>      | AT4G05320 | GGCCTTGTATAATCCCTGATGAATAAG | AAAGAGATAACAGGAACGGAAACATAGT  | Exon 1 and<br>ex jn 1,2  | 76 bp |
| <i>Root</i>       |           |                             |                               |                          |       |
| <b>2 h</b>        |           |                             |                               |                          |       |
| <i>MON1</i>       | AT5G55840 | AACTCTATGCAGCATTTGATCCACT   | TGATTGCATATCTTTATCGCCATC      | Exon 13 and<br>14        | 61 bp |
| <i>RHIP1</i>      | AT4G26410 | GAGCTGAAGTGGCTTCCATGAC      | GGTCCGACATACCCATGATCC         | Ex jn 7, 8<br>and exon 8 | 81 bp |
| <i>EF1α</i>       | AT5G60390 | TGAGCACGCTCTTCTTGCTTTCA     | GGTGGTGGCATCCATCTTGTTACA      | Exon 1 and<br>1,2        | 76 bp |
| <b>24 h</b>       |           |                             |                               |                          |       |
| <i>UBC21</i>      | AT5G25760 | CTGCGACTCAGGGAATCTTCTAA     | TTGTGCCATTGAATTGAACCC         | Exon 3,4<br>and 4        | 61 bp |
| <i>MON1</i>       | AT5G55840 | AACTCTATGCAGCATTTGATCCACT   | TGATTGCATATCTTTATCGCCATC      | Exon 13 and<br>14        | 61 bp |
| <i>TIP41-like</i> | AT4G34270 | GTGAAAACGTGTGGAGAGAAGCAA    | TCAACTGGATACCCTTTCGCA         | Exon 7 and<br>Exon 7,8   | 61 bp |
| <i>YSL8</i>       | AT5G08290 | TTACTGTTTCGGTTGTCTCCATT     | CACTGAATCATGTTCTGAAGCAAGT     | UTR                      | 61 bp |
| <i>UBQ10</i>      | AT4G05320 | GGCCTTGTATAATCCCTGATGAATAAG | AAAGAGATAACAGGAACGGAAACATAGT  | Exon 1 and<br>ex jn 1,2  | 76 bp |
| <i>EF1α</i>       | AT5G60390 | TGAGCACGCTCTTCTTGCTTTCA     | GGTGGTGGCATCCATCTTGTTACA      | Exon 1 and<br>ex jn 1,2  | 76 bp |
| <b>72 h</b>       |           |                             |                               |                          |       |
| <i>UBC21</i>      | AT5G25760 | CTGCGACTCAGGGAATCTTCTAA     | TTGTGCCATTGAATTGAACCC         | Exon 3,4<br>and 4        | 61 bp |

|              |           |                             |                              |                   |       |
|--------------|-----------|-----------------------------|------------------------------|-------------------|-------|
| UBQ10        | AT4G05320 | GGCCTTGTATAATCCCTGATGAATAAG | AAAGAGATAACAGGAACGGAAACATAGT | Exon 1 and<br>1,2 | 76 bp |
| EF1 $\alpha$ | AT5G60390 | TGAGCACGCTCTTCTTGCTTTCA     | GGTGGTGGCATCCATCTTGTTACA     | Exon 1 and<br>1,2 | 76 bp |

**Table S3** Reverse transcription quantitative PCR (RT-qPCR) parameters according to the Minimum Information for publication of Quantitative real-time PCR Experiments (MIQE) guidelines based on Bustin *et al.* (2009).

| Sample - Template               |                                                                                                                                                                                                                          |
|---------------------------------|--------------------------------------------------------------------------------------------------------------------------------------------------------------------------------------------------------------------------|
| SOURCE                          | roots and leaves of three-weeks-old <i>Arabidopsis thaliana</i> plants grown in hydroponics                                                                                                                              |
| METHOD OF PRESERVATION          | snap frozen in N <sub>2</sub> , long-term storage at -80°                                                                                                                                                                |
| STORAGE TIME                    | < 6 months                                                                                                                                                                                                               |
| HANDLING                        | frozen                                                                                                                                                                                                                   |
| EXTRACTION METHOD               | silica-columns: RNAqueous™ Kit (Ambion, Thermo Fisher Scientific, Waltham, MA, USA)                                                                                                                                      |
| RNA; DNA-FREE                   | turbo DNA-free™ Kit (Ambion, Thermo Fisher Scientific, Waltham, MA, USA)<br>use of intron-spanning primers if possible<br>verification of amplicon-specificity via dissociation curve                                    |
| CONCENTRATION                   | NanoDrop® ND-1000 spectrophotometer (Thermo Fisher Scientific, Waltham, Ma, USA)                                                                                                                                         |
| Assay optimisation – Validation |                                                                                                                                                                                                                          |
| ACCESSION NUMBER                | see Supplementary Table S1 & S2                                                                                                                                                                                          |
| AMPLICON DETAILS                | see Supplementary Table S1 & S2                                                                                                                                                                                          |
| PRIMERS SEQUENCE                | see Supplementary Table S1 & S2                                                                                                                                                                                          |
| IN SILICO                       | TAIR primer-BLAST <a href="http://www.arabidopsis.org/Blast/index.jsp">http://www.arabidopsis.org/Blast/index.jsp</a>                                                                                                    |
| EMPIRICAL                       | primer concentration of 300 nM unless mentioned otherwise (Table S1 & S2)<br>annealing temperature of 60°C                                                                                                               |
| PRIMING CONDITIONS              | combinations of oligo-dT and random hexamer primers                                                                                                                                                                      |
| PCR EFFICIENCY                  | dilution curves of pooled samples (slope, deviation)                                                                                                                                                                     |
| LINEAR DYNAMIC RANGE            | samples are within the range of the efficiency curve                                                                                                                                                                     |
| RT and qPCR                     |                                                                                                                                                                                                                          |
| PROTOCOLS                       | Turbo DNA-free™ Kit (Ambion, Thermo Fisher Scientific, Waltham, MA, USA)<br>PrimeScript™ RT Reagent Kit (Perfect Real Time, Takara Bio Inc., Kusatsu, Japan)<br>Qauntinova™ SYBR® Green PCR kit (Qiagen, Hilde, Germany) |

|                      | as described in the Materials and Methods section                                                             |
|----------------------|---------------------------------------------------------------------------------------------------------------|
| REAGENTS             | as described in the Materials and Methods section                                                             |
| NON TEMPLATE CONTROL | verification based on Cq-value and dissociation curve                                                         |
| Data analysis        |                                                                                                               |
| SOFTWARE             | QuantStudio™ Design & Analysis Software ( Applied Biosystems, Thermo Fisher Scientific, Foster City, CA, USA) |
| STATISTICAL ANALYSIS | specified in Materials and Methods section and legends of Figures and Tables                                  |
| NORMALISATION        | a selection of at least three reference genes based on the GrayNorm algorithm (Remans <i>et al.</i> 2014)     |
|                      | see Materials and Methods section                                                                             |

**Supplemental Table S4** Percentage reduced glutathione (GSH) deduced from oxidised GSSG levels and total GSH levels in leaves and roots of 3 weeks old wild-type (WT) and *cad2-1* mutant *Arabidopsis thaliana* plants grown under control conditions (0  $\mu$ M CdSO<sub>4</sub>, light bars) or exposed to 5  $\mu$ M CdSO<sub>4</sub> (dark bars) during 2 h, 24 h and 72 h. For each time point, data presented as the mean  $\pm$  S.E. of 4 biological replicates. Significant differences (2-way ANOVA:  $p < 0.05$ ) within each time point are indicated with different letters. L.O.D.: limit of detection for oxidised GSSG.

| Reduced GSH (%) |                      |                               |                               |                                |                                |                               |                               |
|-----------------|----------------------|-------------------------------|-------------------------------|--------------------------------|--------------------------------|-------------------------------|-------------------------------|
|                 |                      | 2 h                           |                               | 24 h                           |                                | 72 h                          |                               |
|                 | [CdSO <sub>4</sub> ] | WT                            | <i>cad2-1</i>                 | WT                             | <i>cad2-1</i>                  | WT                            | <i>cad2-1</i>                 |
| Leaf            | 0 $\mu$ M            | 96.87 $\pm$ 9.01 <sup>a</sup> | 97.98 $\pm$ 1.74 <sup>a</sup> | 96.94 $\pm$ 0.30 <sup>a</sup>  | 96.11 $\pm$ 0.75 <sup>a</sup>  | 90.82 $\pm$ 0.81 <sup>a</sup> | 94.37 $\pm$ 0.46 <sup>b</sup> |
|                 | 5 $\mu$ M            | 97.56 $\pm$ 7.43 <sup>a</sup> | 98.06 $\pm$ 1.23 <sup>a</sup> | 98.92 $\pm$ 0.22 <sup>b</sup>  | 98.84 $\pm$ 0.07 <sup>ab</sup> | 96.56 $\pm$ 1.08 <sup>c</sup> | 98.08 $\pm$ 0.43 <sup>c</sup> |
| Root            | 0 $\mu$ M            | 95.95 $\pm$ 7.38              | 96.92 $\pm$ 1.91              | 97.97 $\pm$ 0.39 <sup>a</sup>  | 98.05 $\pm$ 0.24 <sup>a</sup>  | 97.00 $\pm$ 0.92 <sup>a</sup> | 96.89 $\pm$ 1.33 <sup>a</sup> |
|                 | 5 $\mu$ M            | 99.96 $\pm$ 0.22              | L.O.D.                        | 97.34 $\pm$ 0.70 <sup>ab</sup> | 95.52 $\pm$ 0.09 <sup>b</sup>  | 98.06 $\pm$ 0.11 <sup>a</sup> | 96.77 $\pm$ 1.03 <sup>a</sup> |

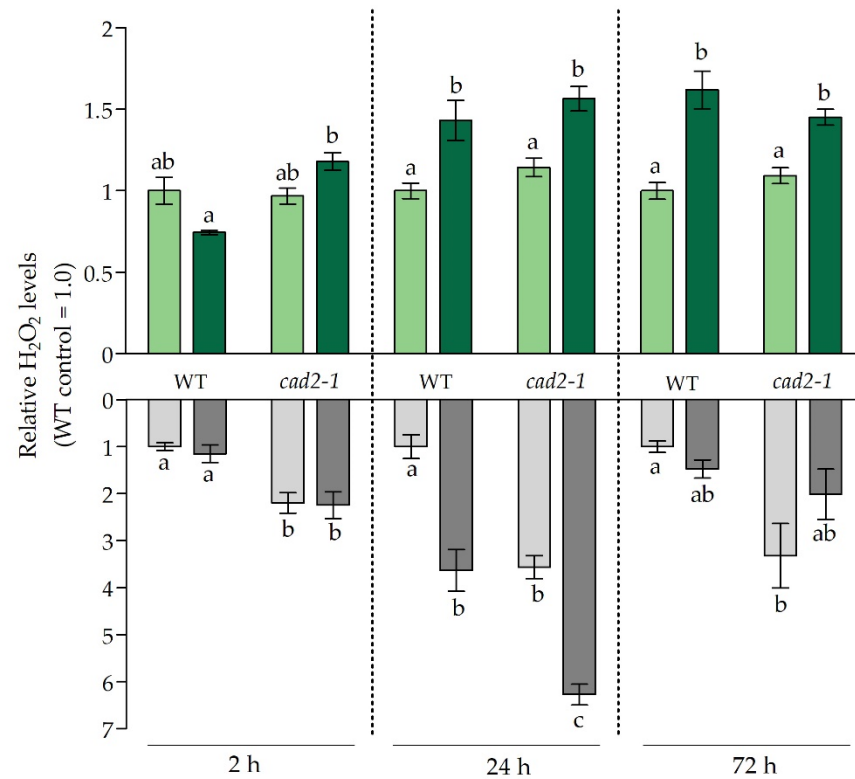

**Supplemental Figure S1** Relative hydrogen peroxide (H<sub>2</sub>O<sub>2</sub>) levels in leaves (green bars) and roots (grey bars) of 3 weeks old wild-type (WT) and *cad2-1* mutant *Arabidopsis thaliana* plants grown under control conditions (0 μM CdSO<sub>4</sub>, light bars) or exposed to 5 μM CdSO<sub>4</sub> (dark bars) during 2 h, 24 h and 72 h. Data are presented as the mean ± S.E. of at least three biological independent replicates relative to the control of the WT set at 1.00. Significant differences (2-way ANOVA:  $p < 0.05$ ) within each time point are indicated with different letters.

**Supplemental Table S5** Relative gene expression levels of antioxidative enzymes in leaves and roots of 3 weeks old wild-type (WT) and *cad2-1* mutant *Arabidopsis thaliana* plants grown under control conditions (0  $\mu$ M CdSO<sub>4</sub>, light bars) or exposed to 5  $\mu$ M CdSO<sub>4</sub> (dark bars) during 2 h, 24 h and 72 h. Data are presented as the mean  $\pm$  S.E. of at least three biological independent replicates relative to the control of the corresponding genotype set at 1.00. Significant differences (2-way ANOVA:  $p < 0.05$ ) between control and Cd-exposed plants of the same genotype, within each time point are marked in colour (upregulated:  , downregulated:  ). Significant differences between Cd-induced responses of both genotypes within each time point are indicated with an asterisk (\*). APX: ascorbate peroxidase , CAT: catalase.

| Antioxidative enzymes |                   |             |               |             |                 |             |               |
|-----------------------|-------------------|-------------|---------------|-------------|-----------------|-------------|---------------|
| Gene                  | CdSO <sub>4</sub> | 2 h         |               | 24 h        |                 | 72 h        |               |
|                       |                   | WT          | <i>cad2-1</i> | WT          | <i>cad2-1</i>   | WT          | <i>cad2-1</i> |
| <i>Leaf</i>           |                   |             |               |             |                 |             |               |
| <i>APX1</i>           | 0 μM              | 1.00 ± 0.08 | 1.00 ± 0.08   | 1.00 ± 0.02 | 1.00 ± 0.08     | 1.00 ± 0.02 | 1.00 ± 0.02   |
|                       | 5 μM              | 1.04 ± 0.12 | 0.65 ± 0.04*  | 2.13 ± 0.18 | 1.25 ± 0.27     | 1.41 ± 0.36 | 0.44 ± 0.00   |
| <i>APX2</i>           | 0 μM              | 1.00 ± 0.09 | 1.00 ± 0.15   | 1.00 ± 0.21 | 1.00 ± 0.35     | 1.00 ± 0.12 | 1.00 ± 0.29   |
|                       | 5 μM              | 0.65 ± 0.09 | 0.85 ± 0.18   | 4.21 ± 1.41 | 0.41 ± 0.20*    | 4.02 ± 0.75 | 0.22 ± 0.00   |
| <i>CAT1</i>           | 0 μM              | 1.00 ± 0.07 | 1.00 ± 0.14   | 1.00 ± 0.04 | 1.00 ± 0.14     | 1.00 ± 0.18 | 1.00 ± 0.22   |
|                       | 5 μM              | 1.10 ± 0.14 | 0.62 ± 0.05*  | 3.48 ± 0.41 | 1.20 ± 0.36*    | 1.12 ± 0.34 | 0.91 ± 0.03   |
| <i>CAT2</i>           | 0 μM              | 1.00 ± 0.03 | 1.00 ± 0.12   | 1.00 ± 0.10 | 1.00 ± 0.10     | 1.00 ± 0.01 | 1.00 ± 0.06   |
|                       | 5 μM              | 0.89 ± 0.11 | 0.71 ± 0.05   | 0.30 ± 0.04 | 0.72 ± 0.03*    | 1.02 ± 0.22 | 0.66 ± 0.10   |
| <i>Root</i>           |                   |             |               |             |                 |             |               |
| <i>APX1</i>           | 0 μM              | 1.00 ± 0.01 | 1.00 ± 0.11   | 1.00 ± 0.05 | 1.00 ± 0.03     | 1.00 ± 0.14 | 1.00 ± 0.09   |
|                       | 5 μM              | 1.10 ± 0.04 | 1.16 ± 0.05   | 1.04 ± 0.05 | 1.75 ± 0.21     | 0.98 ± 0.05 | 0.75 ± 0.05   |
| <i>APX2</i>           | 0 μM              | 1.00 ± 0.19 | 1.00 ± 0.04   | 1.00 ± 0.02 | 1.00 ± 0.02     | 1.00 ± 0.17 | 1.00 ± 0.30   |
|                       | 5 μM              | 2.25 ± 0.27 | 14.95 ± 1.61* | 9.02 ± 1.29 | 157.47 ± 36.74* | 0.26 ± 0.07 | 6.99 ± 0.62*  |
| <i>CAT1</i>           | 0 μM              | 1.00 ± 0.05 | 1.00 ± 0.02   | 1.00 ± 0.07 | 1.00 ± 0.04     | 1.00 ± 0.14 | 1.00 ± 0.06   |
|                       | 5 μM              | 0.90 ± 0.08 | 0.89 ± 0.04   | 3.74 ± 0.25 | 4.16 ± 0.07     | 1.81 ± 0.02 | 2.64 ± 0.33*  |
| <i>CAT2</i>           | 0 μM              | 1.00 ± 0.15 | 1.00 ± 0.08   | 1.00 ± 0.04 | 1.00 ± 0.08     | 1.00 ± 0.15 | 1.00 ± 0.07   |
|                       | 5 μM              | 0.78 ± 0.12 | 0.78 ± 0.00   | 0.38 ± 0.01 | 1.05 ± 0.04*    | 0.64 ± 0.02 | 0.36 ± 0.05*  |

**Supplemental Table S6** Relative gene expression levels of ROS-generating NADPH oxidases in leaves and roots of 3 weeks old wild-type (WT) and *cad2-1* mutant *Arabidopsis thaliana* plants grown under control conditions (0  $\mu$ M CdSO<sub>4</sub>, light bars) or exposed to 5  $\mu$ M CdSO<sub>4</sub> (dark bars) during 2 h, 24 h and 72 h. Data are presented as the mean  $\pm$  S.E. of at least three biological independent replicates relative to the control of the corresponding genotype set at 1.00. Significant differences (2-way ANOVA:  $p < 0.05$ ) between control and Cd-exposed plants of the same genotype, within each time point are marked in colour (upregulated:  , downregulated:  ). Significant differences between Cd-induced responses of both genotypes within each time point are indicated with an asterisk (\*). *RBOH*: respiratory burst oxidase homologue.

| Gene         | CdSO <sub>4</sub> | ROS-generating NADPH oxidase |                  |                  |                  |                 |                  |
|--------------|-------------------|------------------------------|------------------|------------------|------------------|-----------------|------------------|
|              |                   | 2 h                          |                  | 24 h             |                  | 72 h            |                  |
|              |                   | WT                           | <i>cad2-1</i>    | WT               | <i>cad2-1</i>    | WT              | <i>cad2-1</i>    |
| <i>Leaf</i>  |                   |                              |                  |                  |                  |                 |                  |
| <i>RBOHC</i> | 0 $\mu$ M         | 1.00 $\pm$ 0.32              | 1.00 $\pm$ 0.33  | 1.00 $\pm$ 0.14  | 1.00 $\pm$ 0.46  | 1.00 $\pm$ 0.15 | 1.00 $\pm$ 0.38  |
|              | 5 $\mu$ M         | 0.47 $\pm$ 0.06              | 0.74 $\pm$ 0.34  | 79.81 $\pm$ 6.35 | 0.63 $\pm$ 0.11* | 0.58 $\pm$ 0.14 | 1.42 $\pm$ 0.42  |
| <i>RBOHD</i> | 0 $\mu$ M         | 1.00 $\pm$ 0.02              | 1.00 $\pm$ 0.04  | 1.00 $\pm$ 0.16  | 1.00 $\pm$ 0.23  | 1.00 $\pm$ 0.05 | 1.00 $\pm$ 0.06  |
|              | 5 $\mu$ M         | 1.37 $\pm$ 0.02              | 1.17 $\pm$ 0.04* | 2.45 $\pm$ 0.09  | 1.46 $\pm$ 0.23  | 2.25 $\pm$ 0.28 | 1.93 $\pm$ 0.19  |
| <i>RBOHF</i> | 0 $\mu$ M         | 1.00 $\pm$ 0.30              | 1.00 $\pm$ 0.19  | 1.00 $\pm$ 0.08  | 1.00 $\pm$ 0.13  | 1.00 $\pm$ 0.10 | 1.00 $\pm$ 0.14  |
|              | 5 $\mu$ M         | 0.72 $\pm$ 0.13              | 0.58 $\pm$ 0.07  | 6.74 $\pm$ 0.82  | 0.66 $\pm$ 0.11* | 3.99 $\pm$ 0.58 | 1.20 $\pm$ 0.01* |
| <i>Root</i>  |                   |                              |                  |                  |                  |                 |                  |
| <i>RBOHC</i> | 0 $\mu$ M         | 1.00 $\pm$ 0.01              | 1.00 $\pm$ 0.17  | 1.00 $\pm$ 0.06  | 1.00 $\pm$ 0.01  | 1.00 $\pm$ 0.16 | 1.00 $\pm$ 0.10  |
|              | 5 $\mu$ M         | 1.41 $\pm$ 0.19              | 1.18 $\pm$ 0.03  | 1.04 $\pm$ 0.06  | 0.87 $\pm$ 0.06  | 0.68 $\pm$ 0.02 | 0.69 $\pm$ 0.04  |
| <i>RBOHD</i> | 0 $\mu$ M         | 1.00 $\pm$ 0.10              | 1.00 $\pm$ 0.14  | 1.00 $\pm$ 0.04  | 1.00 $\pm$ 0.05  | 1.00 $\pm$ 0.11 | 1.00 $\pm$ 0.14  |
|              | 5 $\mu$ M         | 1.56 $\pm$ 0.01              | 2.43 $\pm$ 0.13* | 4.50 $\pm$ 0.60  | 3.90 $\pm$ 0.21  | 2.51 $\pm$ 0.28 | 2.38 $\pm$ 0.45  |
| <i>RBOHF</i> | 0 $\mu$ M         | 1.00 $\pm$ 0.03              | 1.00 $\pm$ 0.03  | 1.00 $\pm$ 0.03  | 1.00 $\pm$ 0.04  | 1.00 $\pm$ 0.08 | 1.00 $\pm$ 0.06  |
|              | 5 $\mu$ M         | 1.28 $\pm$ 0.03              | 1.28 $\pm$ 0.05  | 2.20 $\pm$ 0.08  | 1.92 $\pm$ 0.05  | 1.98 $\pm$ 0.25 | 1.78 $\pm$ 0.23  |



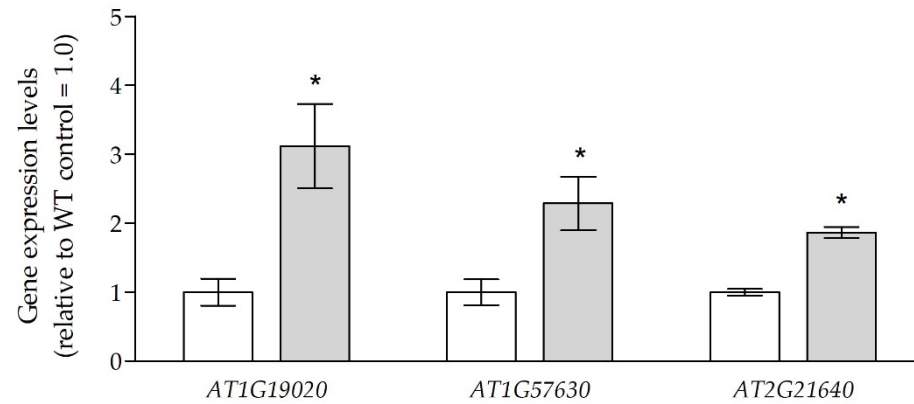

**Supplemental Figure S2** Relative gene expression levels of a subset of oxidative stress markers in roots after 24 h under control conditions (0  $\mu$ M CdSO<sub>4</sub>) in 3 weeks old wild-type (WT, white bars) and *cad2-1* mutant (grey bars) *Arabidopsis thaliana* plants. Data are represented as the mean  $\pm$  S.E. of at least three biological independent replicates relative to the control of the WT set at 1.00. For each gene, significant differences (t-test;  $p < 0.05$ ) between the two genotypes under control conditions are indicated with an asterisk (\*).
